# Supplementary material for: Ligand-mediated strategy for the fabrication of hollow Fe-MOFs and their derived Fe/NC nanostructures with an enhanced oxygen reduction reaction
Source: Royal Society of Chemistry journal article supplement (doi:10.1039/d0ce01594f), 2021-01-01
Supplement: d0ce01594f1.pdf [file d0ce01594f1.pdf]

## **Electronic Supplementary Information**

### **Ligand-mediated strategy for fabrication of hollow Fe-based MOFs and their derived Fe/NC nanostructures with enhanced oxygen reduction reaction**

Yan Liu,<sup>a</sup> Yamin Zheng,<sup>a</sup> Panpan Dong,<sup>a</sup> Ning Lu,<sup>a</sup> Ruirui Zhang<sup>b</sup> and Junjie Mao<sup>\*a</sup>

<sup>a</sup>Key Laboratory of Functional Molecular Solids, Ministry of Education, Anhui Province Key Laboratory of Optoelectric Materials Science and Technology, Anhui Normal University, Wuhu, 241002, China. E-mail: maochem@ahnu.edu.cn

<sup>b</sup>Department of Chemistry, Chair of Inorganic and Metal-Organic Chemistry, Technical University of Munich, 85748 Garching, Germany.

## **1. Experimental methods and characterizations**

### **1.1 Reagents.**

Ferric chloride hexahydrate, terephthalic acid (98.0 %), dimethylformamide, hexamethylenetetramine (99.0 %), ethanol and hydrochloric acid (38.0-40.0 %) were obtained from Sinopharm Chemical. In all of the experiments, the deionized water was obtained through ion-exchange and filtration. All the reagents were utilized without further purification.

### **1.2 Synthesis.**

#### **Synthesis of Fe-MOF:**

Normally, 296 mg ferric chloride and 200 mg terephthalic acid were dissolved in the mixed solution of 20 ml DMF and 6 ml ethanol under vigorous stirring. After stirring for 30 minutes at room temperature, the mixture was transferred into 50 mL Teflon-lined stainless-steel autoclave, placed in an oven and heated at 150 °C for 3 h. After cooling down to room temperature, the Fe-MOF were obtained by centrifugation and washed with ethanol for several times.

#### **Synthesis of Fe-MOF with hollow octahedral morphology:**

Normally, 100 mg Fe-MOF and 200 mg Hexamethylenetetramine were dissolved in 30ml ethanol under vigorous stirring. After stirring for 30 minutes, the mixture was transferred into 50 mL Teflon-lined stainless-steel autoclave, and placed in an oven and heated at 170 °C for 20 h. After cooling down to room temperature, the hollow Fe-MOF were collected by centrifugation and washed with ethanol for several times.

#### **Synthesis of o-Fe/NC:**

Firstly, hollow octahedral shaped Fe-MOF was pyrolyzed at 900 °C under N<sub>2</sub> atmosphere for 3 h. After colling to room temperature, the above sample was treated with 1 M HCl solution and stirring for 10 h to remove unstable Fe species.

### **1.3 Morphology analysis.**

The morphology of the samples was characterized by transmission electron microscope (TEM) was operated by a Hitachi-7700 working at 100 kV. The HAADF-STEM images were obtained by FEI Tecnai G2 F20 S-Twin HRTEM which worked at 200 kV. HAADF-STEM images were obtained by using a Titan Cubed Themis 60–300 scanning transmission electron microscope operated at 300 kV, equipped with a probe spherical aberration corrector. The metal content of single atom catalysts was characterized by inductively coupled plasma-mass spectrometry (ICP-MS), which was carried out on Thermo Fisher IRIS Intrepid II. Powder X-ray diffraction pattern (PXRD) was used a Rigaku D/max 2500Pc X-ray powder diffractometer with monochromatized Cu K $\alpha$  radiation ( $\lambda = 1.5418 \text{ \AA}$ ).

### **1.4 Electrochemical measurements.**

The ORR performance was measured by CHI760E electrochemical station with three-electrode system in 0.1 M KOH solution. Catalyst ink was prepared by 10 mg of catalyst ultrasonically dispersed into the mixture (2 mL) of ethanol (0.990 mL), water (0.990 mL) and Nafion solution (20  $\mu\text{L}$ ) for 30 min. Then 20  $\mu\text{L}$  of the catalyst suspension was dropped on a fresh glassy carbon (GC) electrode. The substrate for the working electrode employed a rotating disk electrode (RDE) along with 5 mm diameter of GC disk. A graphite rod and Ag/AgCl electrode were selected as the counter electrode and reference electrode, respectively. The cyclic voltammetry (CV) tests were performed in O<sub>2</sub>-saturated 0.1 M KOH solution with a scan rate of 50 mV s<sup>-1</sup>. The linear sweep voltammetry (LSV) experiments were determined using RDE tests (1600 rpm). For further determine the long-term durability, the accelerated durability test was conducted with continuously cycling between 0.6 and 1.0 V vs. RHE in O<sub>2</sub>-saturated 0.1 M KOH solution. Moreover, the tolerance to CH<sub>3</sub>OH was verified by cyclic voltammetry measurements in O<sub>2</sub>-saturated 0.1 M KOH solution.

## 1.5 Calculation details.

All the density functional theory (DFT) calculations were performed in the Vienna ab initio simulation package (VASP)<sup>1</sup>. Perdew-Burke-Ernzerhof (PBE)<sup>2</sup> exchange-correlation functional and projector augmented-wave (PAW)<sup>3</sup> potential were employed to describe electronic exchange-correlation effect and electron-ion interaction, respectively. The force and energy convergence criterion were set to be 0.02 eV/Å and 10<sup>-5</sup> eV, respectively. The energy cutoff of 500 eV was employed for the plane wave expansion and a 15 Å vacuum region was constructed to avoid interactions between adjacent images. The Brillouin zone was sampled by 3×3×1 k-meshes in the Monkhorst-Pack<sup>4</sup> scheme. The overpotential for the ORR was calculated by the computational hydrogen electrode model<sup>5</sup>. The Gibbs-free-energy change (ΔG) of each oxygen reduction reaction (ORR) step was computed by the following equation:

$$\Delta G = \Delta E + \Delta ZPE - T\Delta S + \Delta G_U + \Delta G_{pH}$$

Where ΔE is the energy change, ΔZPE and ΔS is the zero point energy and entropy change at 298.15 K, respectively. ΔG<sub>U</sub> = -eU represents the deviation from an electron transferring at the electrode potential U. ΔG<sub>pH</sub> = kBTln10 × pH is the contribution of the hydrogen ion. U and pH are set to be 0.

The overall reaction of O<sub>2</sub> reduction to H<sub>2</sub>O in acidic environment is a four-electron reaction: O<sub>2</sub> + 4H<sup>+</sup> + 4e<sup>-</sup> → 4H<sub>2</sub>O, which is divided into the following four fundamental steps:

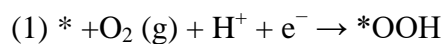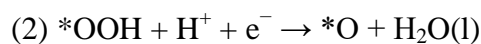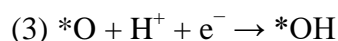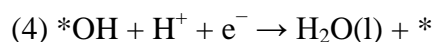

\* represents the adsorption site.

The overpotential ( $\eta$ ), a critical parameter of the ORR activity, is defined as  $\eta=1.23$  eV- $|\Delta G_{\min}|/e$ , where  $\Delta G_{\min}$  is the minimum Gibbs free energy of the four reactions above.

## 2. Supplementary Figures

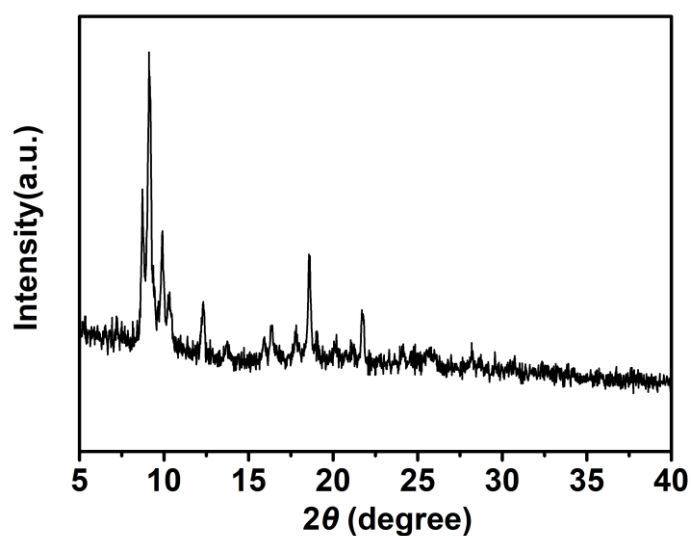

**Figure S1.** PXRD patterns of the Fe-MOFs.

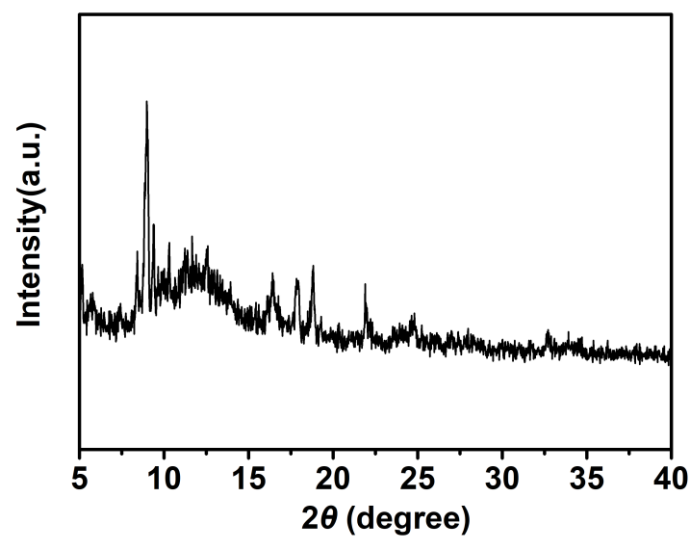

**Figure S2.** PXRD patterns of the hollow Fe-MOFs.

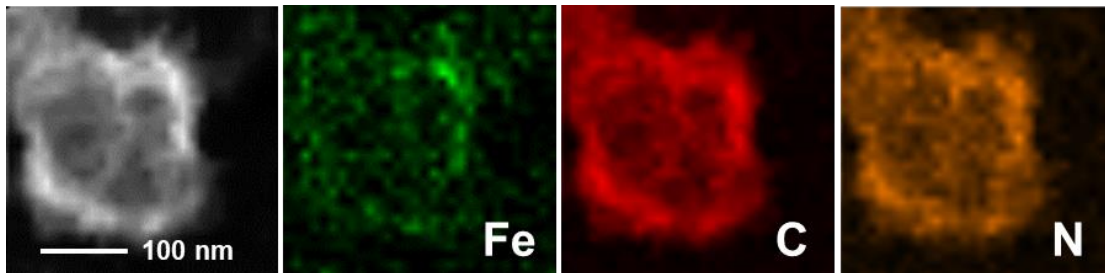

**Figure S3.** HAADF-STEM image and corresponding EDS element mapping images of the o-Fe/NC

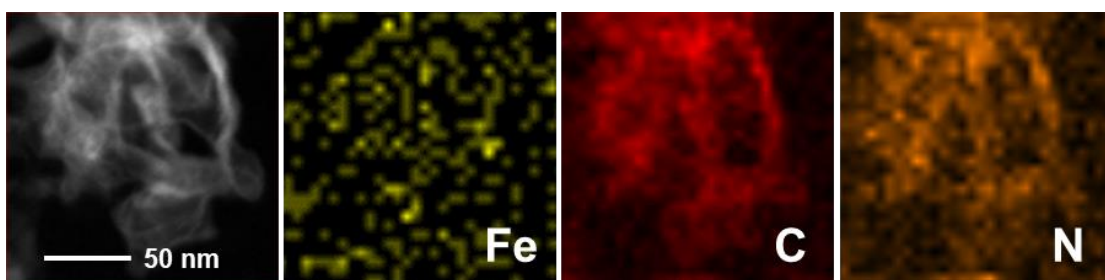

**Figure S4.** HAADF-STEM image and corresponding EDS element mapping images of Fe/NC.

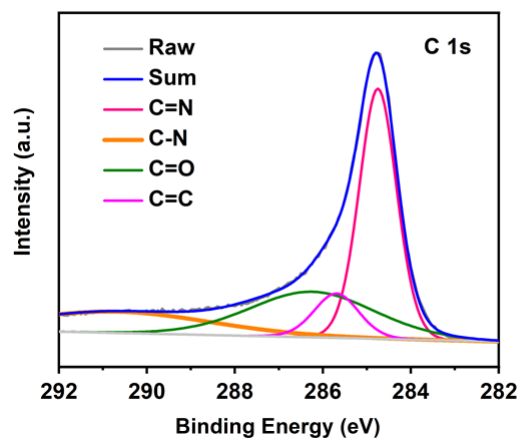

**Figure S5.** The XPS spectrum of C1s for the o-Fe/NC.

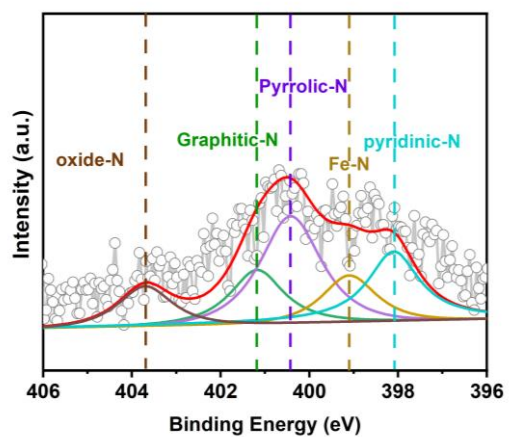

**Figure S6.** The XPS spectrum of N1s for the m-Fe/NC.

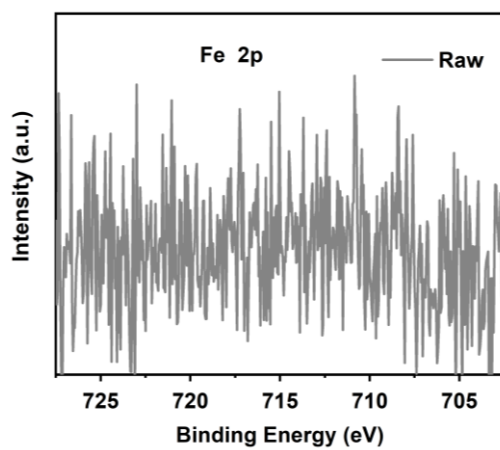

**Figure S7.** The XPS spectrum of Fe 2p for the o-Fe/NC.

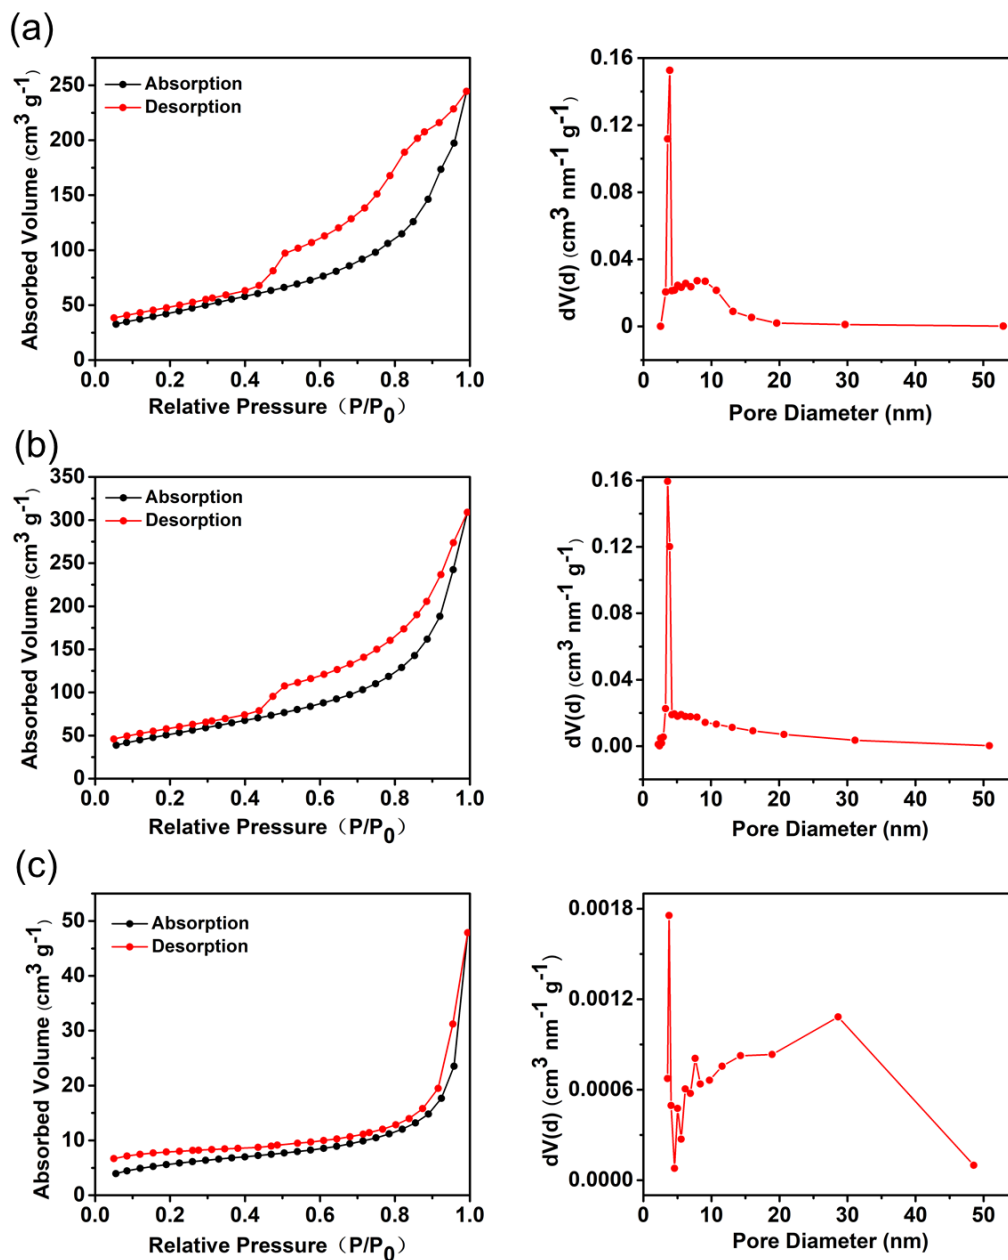

**Figure S8.**  $N_2$  adsorption and desorption isotherms and the pore size distribution curves of (a) o-Fe MOF, (b) o-Fe/NC and (c) m-Fe/NC.



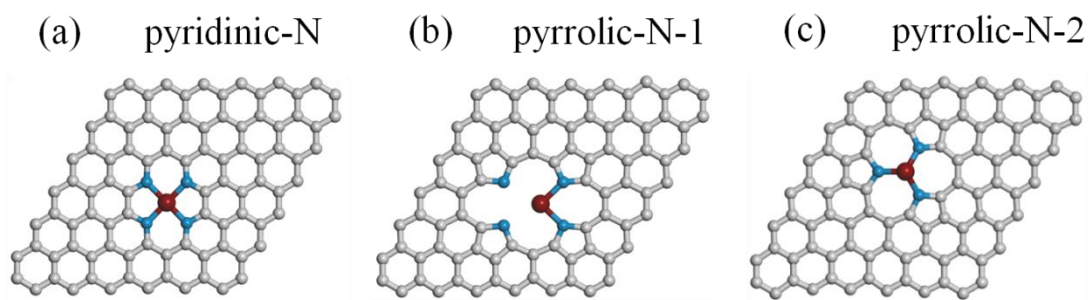

**Figure S9.** Geometric models of Fe atom coordinated with (a) pyridinic-N, (b,c) pyrrolic-N.

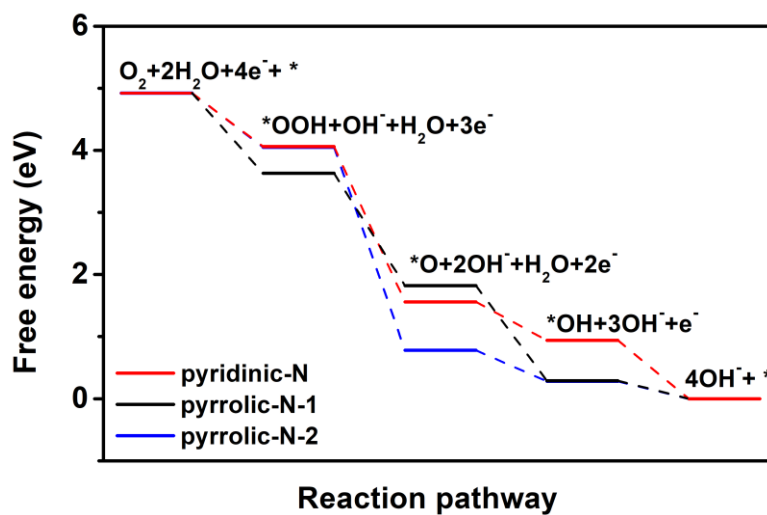

**Figure S10.** Free energy diagrams of oxygen reduction reaction processes for models of pyridinic-N, pyrrolic-N-1 and pyrrolic-N-2.

**Table S1.** The change in Gibbs free energy ( $\Delta G$ ) of each oxygen reduction reaction (ORR) step on surface of pyridinic-N, pyrrolic-N-1 and pyrrolic-N-2.

| Step                                                                                         | pyridinic-N | pyrrolic-N-1 | pyrrolic-N-2 |
|----------------------------------------------------------------------------------------------|-------------|--------------|--------------|
| $* + \text{O}_2 (\text{g}) + \text{H}^+ + \text{e}^- \rightarrow *\text{OOH}$                | -0.86       | -1.29        | -0.87        |
| $*\text{OOH} + \text{H}^+ + \text{e}^- \rightarrow *\text{O} + \text{H}_2\text{O}(\text{l})$ | -2.50       | -1.81        | -3.27        |
| $*\text{O} + \text{H}^+ + \text{e}^- \rightarrow *\text{OH}$                                 | -0.62       | -1.53        | -0.50        |
| $*\text{OH} + \text{H}^+ + \text{e}^- \rightarrow \text{H}_2\text{O}(\text{l}) + *$          | -0.94       | -0.29        | -0.28        |

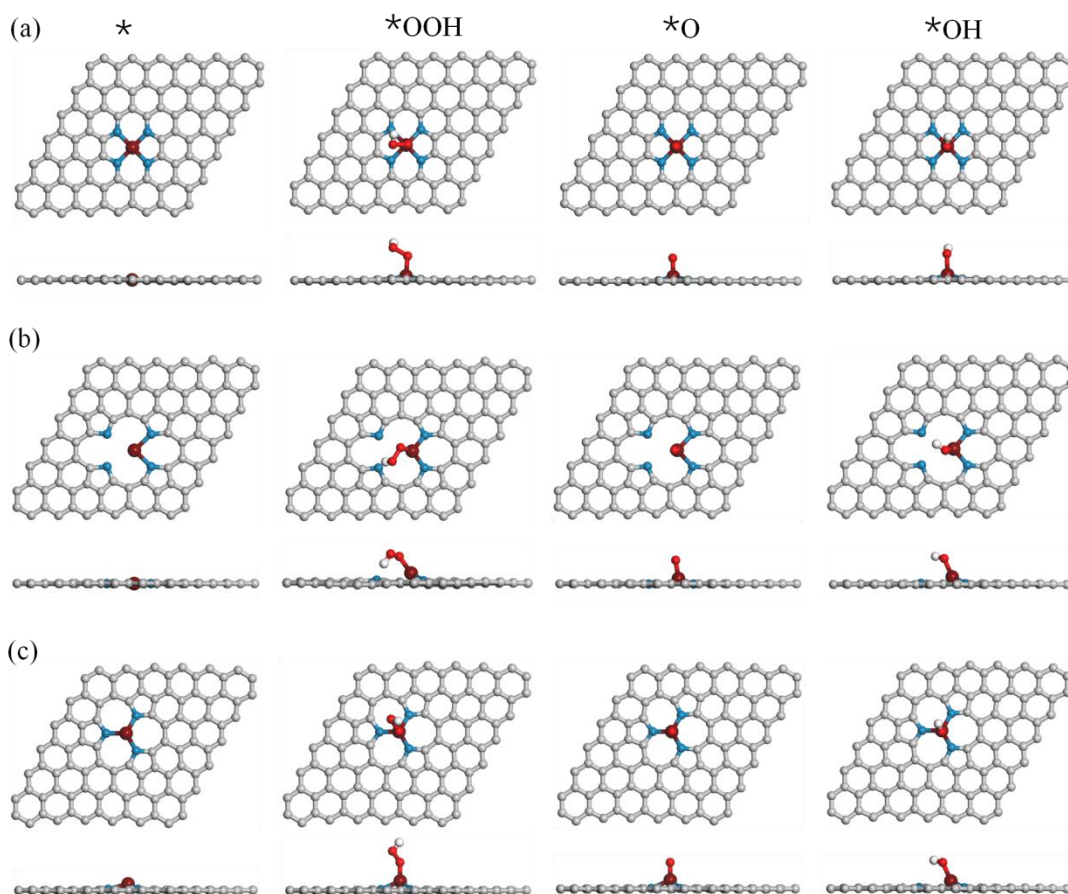

**Figure S11.** Geometric structures of Fe atom coordinated with (a) pyridinic-N, (b) pyrrolic-N-1, (c) pyrrolic-N-2, and the intermediates  $*\text{OOH}$ ,  $*\text{O}$ , and  $*\text{OH}$  for ORR.

### 3. References

- (1) G. Kresse, J. Furthmüller, *Comput. Mater. Sci.*, 1996, **6**, 15-50.
- (2) J. P. Perdew, K. Burke, M. Ernzerhof, *Phys. Rev. Lett.*, 1996, **78**, 3865-3868.
- (3) P. E. Blochl, *Phys. Rev. B*, 1994, **50**, 17953-17979.
- (4) J. K. Nørskov, J. Rossmeisl, A. Logadottir, L. Lindqvist, J. R. Kitchin, T. Bligaard, H. Jonsson, *Phys. Chem. B*, 2004, **108**, 17886-17892.
- (5) H. Monkhorst, J. Pack, *Phys. Rev. B*, 1976, **13**, 5188-5192.
